# Supplementary material for: Exosomal let-7d-3p and miR-30d-5p as diagnostic biomarkers for non-invasive screening of cervical cancer and its precursors
Source: PubMed Central journal article supplement (PMC6446401; doi:10.1186/s12943-019-0999-x), 2019-04-02
Supplement: 12943_2019_999_MOESM5_ESM.pdf [file 12943_2019_999_MOESM5_ESM.pdf]

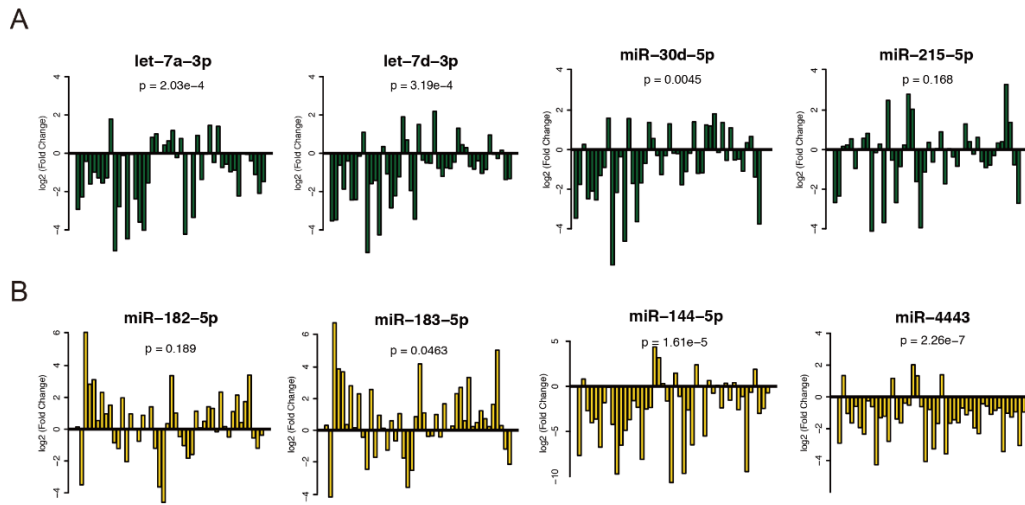

**Figure S3 Expression levels of the top eight significant miRNAs in tumor tissues and their adjacent tissues in cervical cancer patients**

(**A, B**) qRT-PCR results of miRNAs in cervical cancer tissues. Green bars indicated that miRNAs were down-regulated in sequencing data (**A**), while yellow bars indicated that miRNAs were up-regulated in sequencing data (**B**). Fold change is defined as the ratio of miRNA expression in tumor to miRNA expression in adjacent normal tissue from the same patients. Forty-six new patients were analyzed in the study.
