# Supplementary material for: Exosomal let-7d-3p and miR-30d-5p as diagnostic biomarkers for non-invasive screening of cervical cancer and its precursors
Source: PubMed Central journal article supplement (PMC6446401; doi:10.1186/s12943-019-0999-x), 2019-04-02
Supplement: 12943_2019_999_MOESM7_ESM.pdf [file 12943_2019_999_MOESM7_ESM.pdf]

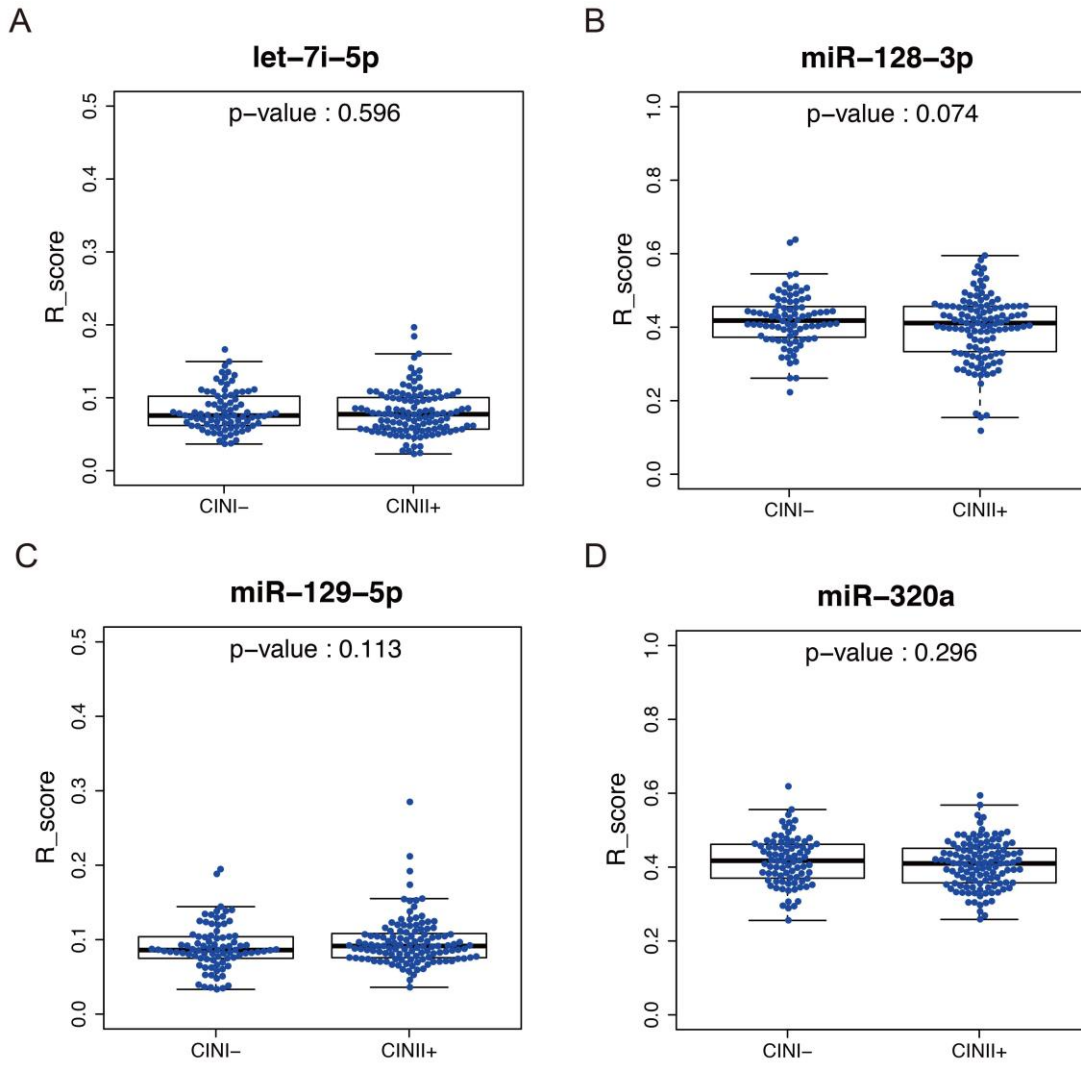

**Figure S5 ddPCR results of four inner control miRNAs in 203 independent plasma samples.**
