# Supplementary material for: Exosomal let-7d-3p and miR-30d-5p as diagnostic biomarkers for non-invasive screening of cervical cancer and its precursors
Source: Springer Nature journal article supplement (doi:10.1186/s12943-019-0999-x), 2019-04-02
Supplement: MOESM4 [file 16591310]

**Table S1 miRNAs differentially expressed between CIN I- and CIN II+ groups in exosome sequencing data.**

| miRNAs          | mean+/-SE<br>(CIN I-) | mean+/-SE<br>(CIN II+) | pvalue.log2 | pvalue.qq | log2.fdr | qq.fdr   |
|-----------------|-----------------------|------------------------|-------------|-----------|----------|----------|
| hsa-miR-144-5p  | 1.14+/-0.40           | 2.19+/-0.86            | 1.01E-15    | 7.73E-20  | 3.58E-12 | 1.54E-10 |
| hsa-miR-4443    | 0.95+/-0.23           | 1.49+/-0.41            | 9.59E-14    | 1.33E-12  | 2.34E-08 | 3.38E-08 |
| hsa-let-7d-3p   | 6.37+/-0.44           | 5.43+/-0.71            | 2.60E-14    | 1.19E-09  | 1.00E-11 | 7.24E-08 |
| hsa-let-7a-3p   | 5.72+/-0.48           | 4.98+/-0.62            | 8.34E-09    | 2.94E-10  | 1.18E-06 | 7.24E-08 |
| hsa-miR-183-5p  | 3.74+/-0.33           | 4.32+/-0.63            | 3.76E-09    | 1.55E-09  | 6.56E-07 | 3.15E-07 |
| hsa-miR-30a-5p  | 9.94+/-0.37           | 9.47+/-0.42            | 1.23E-06    | 4.27E-09  | 3.05E-05 | 4.90E-07 |
| hsa-miR-96-5p   | 0.86+/-0.36           | 1.21+/-0.52            | 0.000185    | 1.04E-08  | 0.003373 | 4.90E-07 |
| hsa-miR-574-3p  | 1.59+/-0.42           | 2.06+/-0.71            | 2.55E-05    | 1.27E-08  | 0.001765 | 3.19E-06 |
| hsa-miR-30d-5p  | 9.06+/-0.49           | 8.25+/-0.54            | 1.63E-10    | 1.11E-07  | 5.15E-07 | 3.24E-06 |
| hsa-miR-182-5p  | 4.02+/-0.55           | 4.80+/-0.72            | 4.33E-08    | 4.03E-08  | 2.97E-06 | 3.24E-06 |
| hsa-miR-337-3p  | 1.35+/-0.29           | 0.94+/-0.34            | 1.66E-08    | 1.21E-07  | 2.97E-06 | 3.24E-06 |
| hsa-miR-148b-3p | 8.93+/-0.50           | 8.20+/-0.57            | 5.80E-08    | 1.24E-07  | 6.48E-06 | 3.04E-05 |
| hsa-let-7b-3p   | 4.22+/-0.37           | 3.78+/-0.59            | 4.27E-06    | 8.17E-07  | 0.000354 | 3.04E-05 |
| hsa-miR-181b-5p | 11.55+/-0.39          | 11.09+/-0.66           | 2.25E-05    | 6.30E-07  | 0.000582 | 3.04E-05 |
| hsa-miR-181a-5p | 11.85+/-0.41          | 11.32+/-0.64           | 8.52E-07    | 1.62E-06  | 3.05E-05 | 6.14E-05 |
| hsa-miR-656-3p  | 8.74+/-0.60           | 8.00+/-0.91            | 2.80E-06    | 9.13E-07  | 0.000105 | 6.14E-05 |
| hsa-miR-215-5p  | 2.23+/-0.55           | 1.46+/-0.71            | 1.03E-07    | 4.11E-06  | 1.57E-05 | 0.000118 |
| hsa-miR-136-5p  | 2.49+/-0.46           | 1.88+/-0.71            | 9.04E-07    | 1.97E-06  | 3.05E-05 | 0.000118 |
| hsa-let-7f-1-3p | 4.02+/-0.45           | 3.52+/-0.51            | 7.17E-06    | 7.60E-06  | 0.000354 | 0.000118 |
| hsa-miR-409-5p  | 3.62+/-0.36           | 3.25+/-0.41            | 1.61E-05    | 6.93E-06  | 0.000582 | 0.000118 |
| hsa-miR-99a-5p  | 15.98+/-0.35          | 15.63+/-0.52           | 2.04E-05    | 8.62E-06  | 0.000582 | 0.000118 |
| hsa-miR-27b-3p  | 11.49+/-0.45          | 11.07+/-0.56           | 0.00032     | 8.07E-06  | 0.006445 | 0.000118 |
| hsa-miR-455-5p  | 4.90+/-0.46           | 4.38+/-0.50            | 4.07E-06    | 9.10E-06  | 0.000105 | 0.000579 |
| hsa-miR-483-5p  | 2.40+/-0.30           | 2.86+/-0.79            | 9.21E-06    | 2.10E-05  | 0.000582 | 0.000579 |
| hsa-miR-885-5p  | 2.92+/-0.53           | 2.48+/-0.69            | 0.000311    | 2.41E-05  | 0.003373 | 0.000946 |
| hsa-miR-320e    | 2.49+/-0.31           | 2.83+/-0.47            | 1.99E-06    | 3.23E-05  | 5.44E-05 | 0.001581 |
| hsa-miR-10b-5p  | 7.89+/-0.46           | 7.27+/-0.56            | 2.13E-07    | 0.000258  | 3.05E-05 | 0.002798 |
| hsa-miR-1468-5p | 1.40+/-0.37           | 0.96+/-0.36            | 5.26E-07    | 0.000214  | 3.05E-05 | 0.002798 |
| hsa-miR-105-5p  | 6.88+/-0.46           | 6.37+/-0.56            | 2.77E-06    | 0.000164  | 5.44E-05 | 0.002798 |
| hsa-miR-339-5p  | 2.88+/-0.53           | 2.42+/-0.59            | 0.000154    | 0.000361  | 0.003373 | 0.002798 |
| hsa-miR-128-3p  | 14.69+/-0.46          | 14.32+/-0.67           | 0.000245    | 0.000338  | 0.003373 | 0.002798 |
| hsa-miR-381-3p  | 12.42+/-0.54          | 12.82+/-0.57           | 0.000403    | 0.000248  | 0.006445 | 0.002798 |
| hsa-miR-432-5p  | 8.82+/-0.47           | 8.43+/-0.45            | 0.00041     | 9.97E-05  | 0.006953 | 0.002798 |
| hsa-miR-543     | 6.94+/-0.52           | 6.41+/-0.71            | 2.23E-06    | 0.000803  | 5.44E-05 | 0.006533 |
| hsa-miR-365a-3p | 1.34+/-0.42           | 1.00+/-0.39            | 0.000267    | 0.001077  | 0.003373 | 0.006533 |
| hsa-miR-145-3p  | 5.79+/-0.49           | 5.33+/-0.62            | 0.00018     | 0.000688  | 0.003373 | 0.006533 |
| hsa-miR-889-3p  | 7.12+/-0.66           | 6.52+/-0.65            | 0.000173    | 0.001081  | 0.003373 | 0.006533 |

**Note: RPM was transformed with either log2 or quantile-quantile before the analysis. SE: standard error.**
