# Supplementary material for: Exosomal let-7d-3p and miR-30d-5p as diagnostic biomarkers for non-invasive screening of cervical cancer and its precursors
Source: Springer Nature journal article supplement (doi:10.1186/s12943-019-0999-x), 2019-04-02
Supplement: MOESM6 [file 16591310]

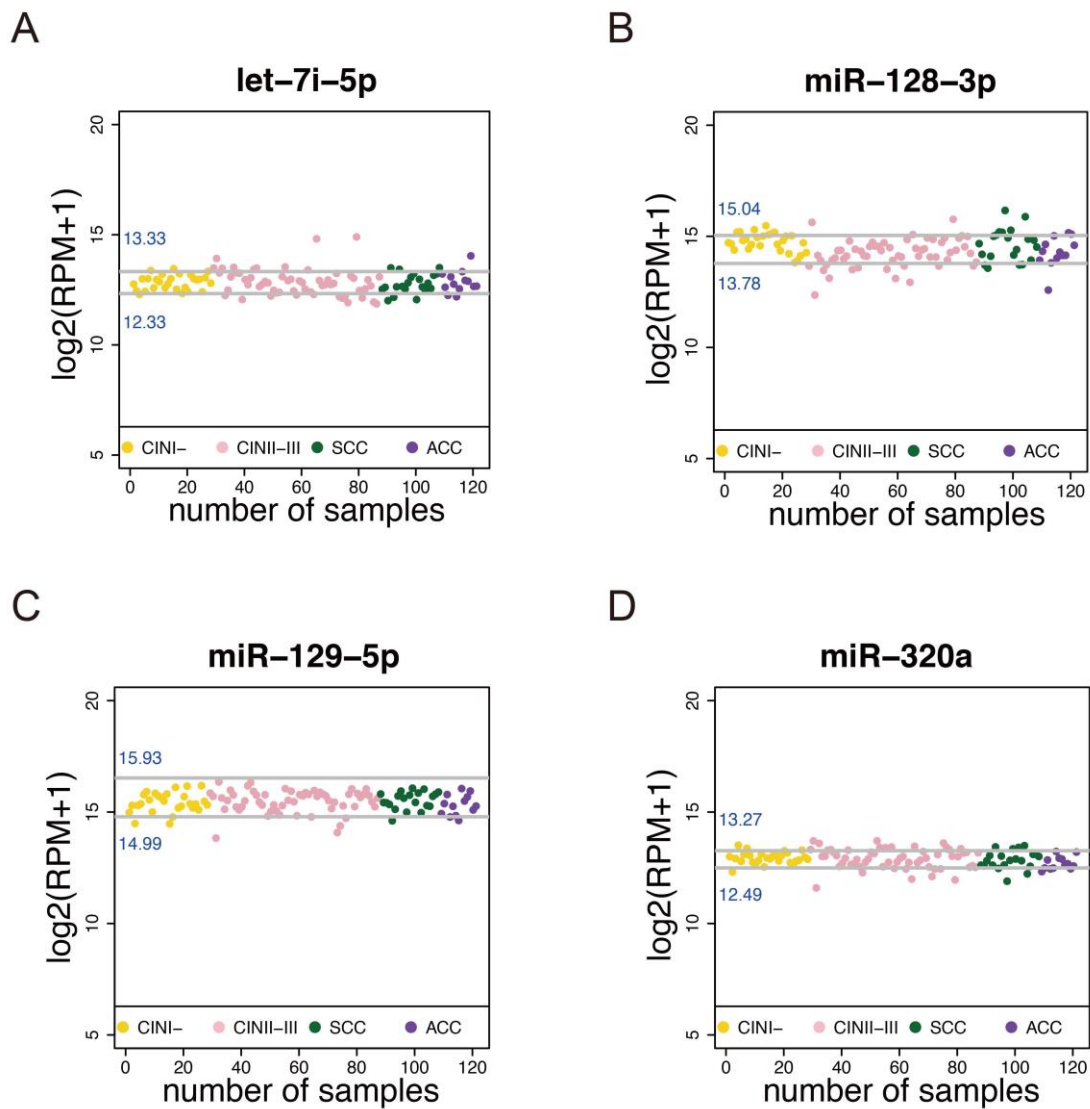

**Figure S4 Expression of four inner control miRNAs from next-generation sequencing data** The gray lines with numbers represented  $\pm 95\%$  confidence interval (CI) values.
