# Supplementary material for: Exosomal let-7d-3p and miR-30d-5p as diagnostic biomarkers for non-invasive screening of cervical cancer and its precursors
Source: Springer Nature journal article supplement (doi:10.1186/s12943-019-0999-x), 2019-04-02
Supplement: MOESM8 [file 16591310]

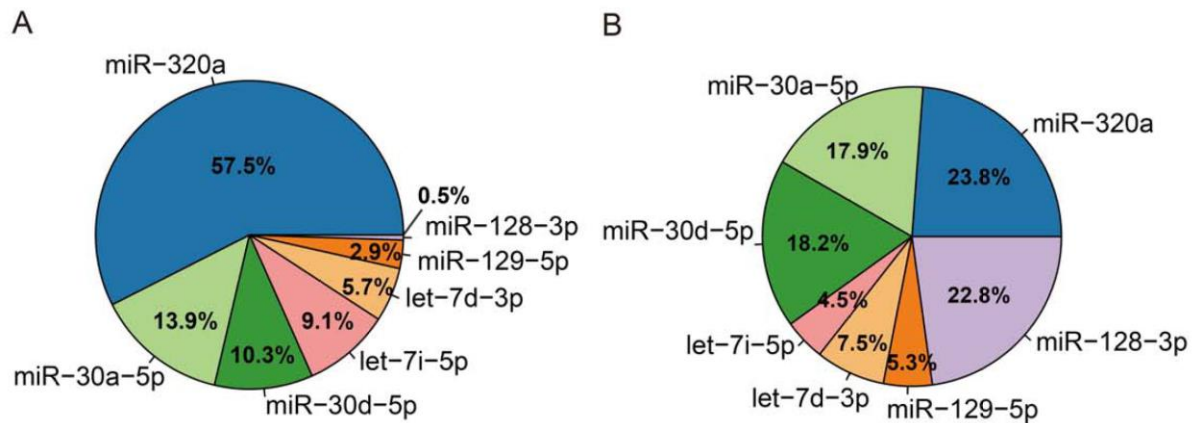

**Figure S6 Distribution of seven miRNAs in tissue and exosome**

(A) The average proportion of miRNAs in 46 paired tumor and adjacent normal tissues from cervical cancer patients. (B) The average proportion of miRNAs in 203 exosomes (84 samples from the CIN I- group and 119 samples from the CIN II+ group). The expression levels of miRNAs in both exosomal and tissue samples were measured by ddPCR.
